# Supplementary material for: Enhanced Peroxidase-Like Activity of MoS2 Quantum Dots Functionalized g-C3N4 Nanosheets towards Colorimetric Detection of H2O2
Source: Nanomaterials (Basel). 2018 Nov 26;8(12):976. doi: 10.3390/nano8120976 (PMC6316126; doi:10.3390/nano8120976)
Supplement: Supplementary file 1 [file nanomaterials-08-00976-s001.pdf]

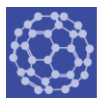

## Supplementary Information

# Enhanced Peroxidase-Like Activity of MoS<sub>2</sub> Quantum Dots Functionalized g-C<sub>3</sub>N<sub>4</sub> Nanosheets towards Colorimetric Detection of H<sub>2</sub>O<sub>2</sub>

### 1. BET and zeta potential analysis

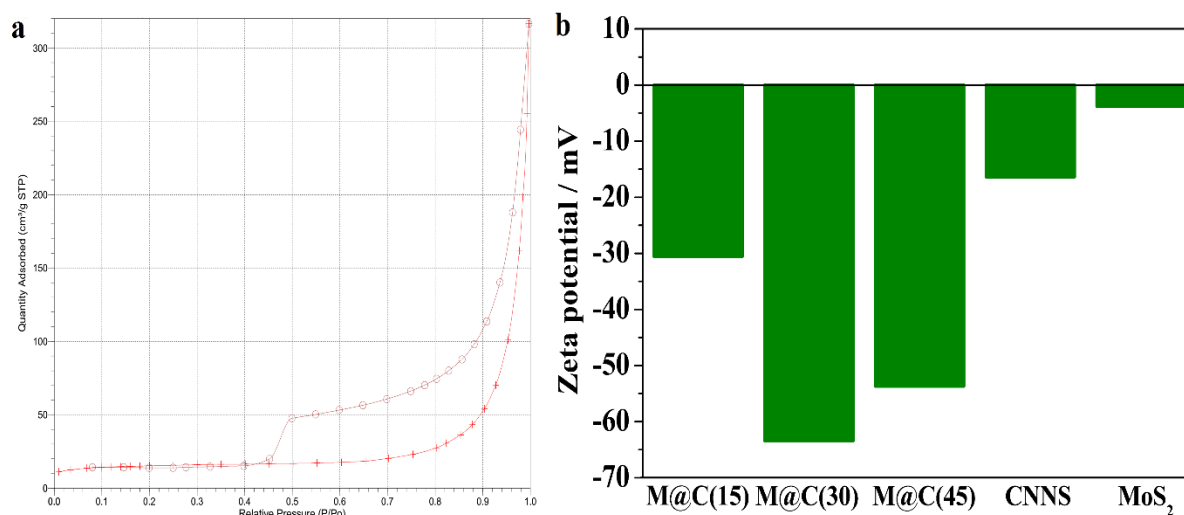

**Figure S1.** Adsorption/desorption isotherms of MoS<sub>2</sub>@CNNS(30) (a) and zeta potentials of the MoS<sub>2</sub>@CNNS nanocomposites dispersed in ultrapure water (pH = 4.0) (b).

### 2. Optimization of experimental conditions

The effect of MoS<sub>2</sub>@CNNS(30) concentration (0~200 µg/mL), H<sub>2</sub>O<sub>2</sub> concentration (0~5.0 mM), temperature (10~50 °C), and pH (2.0~9.0) on the peroxidase-like activity of MoS<sub>2</sub>@CNNS(30) were assayed with the same procedures to the peroxidase mimetic experiments to obtain the optimal reaction conditions. Typically, the tests were performed by in sequence adding 500 µL of 50.0 mM phosphate buffer solution (PBS, pH = 2.0~9.0), 100 µL of 8.0 mM TMB, 200 µL H<sub>2</sub>O<sub>2</sub> with the final concentration of 0~5.0 mM, and 200 µL MoS<sub>2</sub>@CNNS(30) dispersion with the final concentration of 0~200 µg/mL under the temperature range of 10~50 °C. Make three variable fixed and change another one to obtain the optimal experimental conditions. Then the reaction systems were monitored in a time-scan mode at 652 nm by an UV-visible spectrophotometer (Shimadzu UV-2500, Japan) right after all of the components were added and mixed.

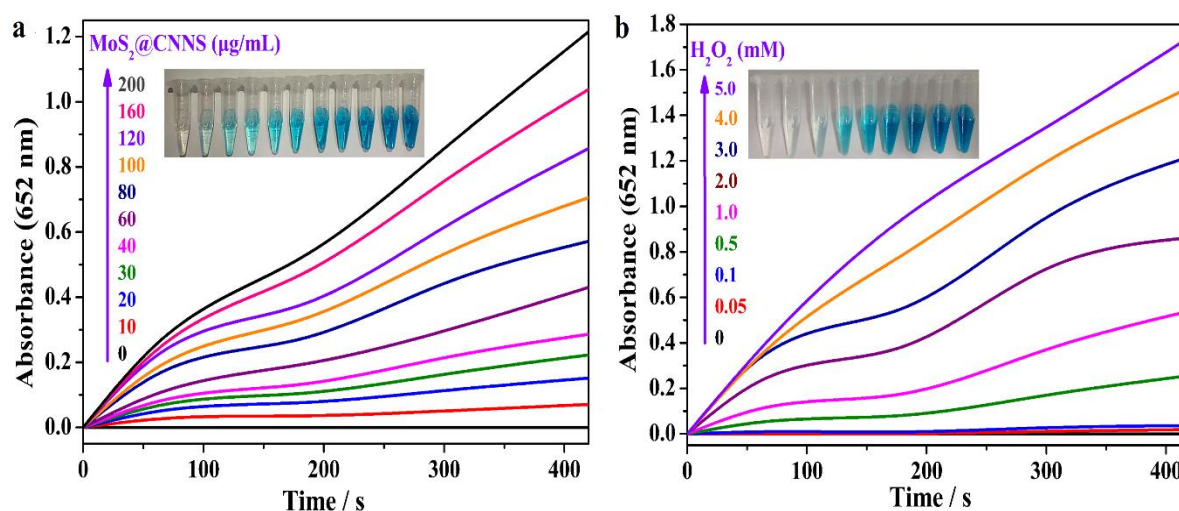

**Figure S2.** Time-dependent absorbance at 652 nm and color changes of 0.8 mM TMB reaction solutions in the absence or presence of different concentrations of MoS<sub>2</sub>@CNNS(30) (a) and H<sub>2</sub>O<sub>2</sub> (b) in 25.0 mM PBS (pH = 4.0) at room temperature. Inset: related color variations.

**Figure S2** shows the catalytic activity tests under different catalyst concentrations and H<sub>2</sub>O<sub>2</sub> concentrations. It can be seen that the catalytic reaction rate obviously increased as increasing the concentration of MoS<sub>2</sub>@CNNS(30) catalysts with an apparent color variation (**Figure S2(a)**). Hence, in view of the operation convenience, the concentration of 120 µg/mL for MoS<sub>2</sub>@CNNS(30) was selected as the optimal concentration. The effects of H<sub>2</sub>O<sub>2</sub> concentration on the catalytic activity of MoS<sub>2</sub>@CNNS(30) were also tested (**Figure S2(b)**). It can be seen that the catalytic reaction rate increased with the increase of H<sub>2</sub>O<sub>2</sub> concentration, and there was no inhibition in the catalytic reaction at high H<sub>2</sub>O<sub>2</sub> concentration, indicating a more stable enzyme catalytic activity of MoS<sub>2</sub>@CNNS(30) than that of horseradish peroxidase (HRP) at high H<sub>2</sub>O<sub>2</sub> concentration [S1]. Therefore, the H<sub>2</sub>O<sub>2</sub> concentration of 2.0 mM was chosen with a medium and visual absorbance. In addition, **Figure S2(b)** shows the color changes with different H<sub>2</sub>O<sub>2</sub> concentration in the reaction system, illustrating that with the increase of H<sub>2</sub>O<sub>2</sub> concentration the color changed from light to dark blue, which further demonstrated the feasibility of H<sub>2</sub>O<sub>2</sub> detection through a colorimetric method.

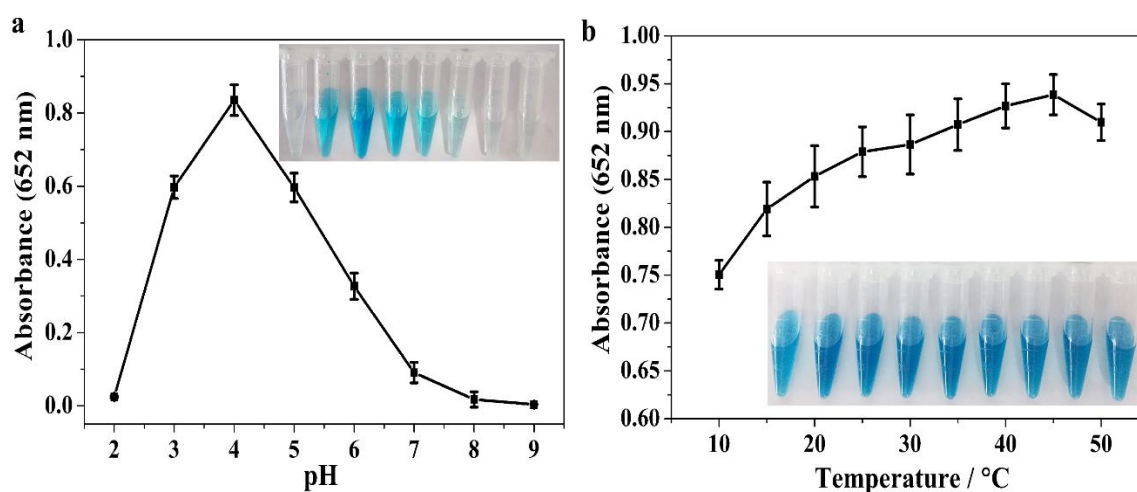

**Figure S3.** Dependency of peroxidase-like activity of MoS<sub>2</sub>@CNNS(30) on pH (a) and temperature (b) and color changes. Experiments were conducted by using 120 µg/mL of MoS<sub>2</sub>@CNNS(30) in 25.0 mM PBS with 2.0 mM H<sub>2</sub>O<sub>2</sub> and 0.8 mM TMB as substrates. Inset: related color variations.

Furthermore, similar to natural enzymes, the catalytic activity of MoS<sub>2</sub>@CNNS(30) is found to be pH-dependent, which was tested by UV-visible spectrophotometer with changing the pH values from pH 2.0 to 9.0. It can be seen in **Figure S3(a)** that the optimal pH value of the reaction was found to be pH 4.0, while the pH value above or lower than 4.0 would lower the peroxidase-like activity. Thus, the optimal pH was 4.0. Moreover, **Figure S3(b)** shows a temperature-dependent assay in the range of 10 °C to 50 °C. It can be seen notably that the reaction system was affected by the temperature, and the catalytic activity exhibited a continue rising tendency, indicating that the inorganic enzyme mimics could present high thermal activities. Therefore, considering the convenience of operation, the room temperature 25 °C was selected as the experimental temperature. The results also indicated the relatively stable peroxidase-like activity of MoS<sub>2</sub>@CNNS(30) even under fairly harsh conditions.

**Table S1.** MoS<sub>2</sub> loading amount in MoS<sub>2</sub>/CNNS samples determined by ICP-AES.

| Sample                     | Composite (g/L) | Mo (mg/L) | S (mg/L) | MoS <sub>2</sub> /composite (wt%) |
|----------------------------|-----------------|-----------|----------|-----------------------------------|
| MoS <sub>2</sub> /CNNS(15) | 1.0             | 12.2      | 8.2      | 2.0                               |
| MoS <sub>2</sub> /CNNS(30) | 1.0             | 34.7      | 22.3     | 5.7                               |
| MoS <sub>2</sub> /CNNS(45) | 1.0             | 34.8      | 22.4     | 5.7                               |

**Table S2.** Comparison of K<sub>m</sub> and V<sub>max</sub> between MoS<sub>2</sub>@CNNS(30) and HRP for H<sub>2</sub>O<sub>2</sub> and TMB.

| Catalyst                   | Substance                     | K <sub>m</sub> (mM) | V <sub>max</sub> (M/s)  | Reference |
|----------------------------|-------------------------------|---------------------|-------------------------|-----------|
| MoS <sub>2</sub> @CNNS(30) | H <sub>2</sub> O <sub>2</sub> | 0.602               | 3.15 × 10 <sup>-8</sup> | This work |
| MoS <sub>2</sub> @CNNS(30) | TMB                           | 0.117               | 3.03 × 10 <sup>-8</sup> | This work |
| HRP                        | H <sub>2</sub> O <sub>2</sub> | 0.214               | 2.46 × 10 <sup>-8</sup> | S2, S3    |
| HRP                        | TMB                           | 0.275               | 1.24 × 10 <sup>-8</sup> | S2, S3    |

**Table S3.** Comparison of peroxidase-like activity in the linear range and detection limit of H<sub>2</sub>O<sub>2</sub> between MoS<sub>2</sub>@CNNS(30) and other peroxidase mimics.

| Mimetic enzyme                                     | Linear range (μM) | Detection limit (μM) | Reference |
|----------------------------------------------------|-------------------|----------------------|-----------|
| MoS <sub>2</sub> @CNNS(30)                         | 2~50              | 0.02                 | This work |
| Fe <sub>3</sub> O <sub>4</sub>                     | 5~100             | 3.0                  | S4        |
| Co-Al LDH                                          | 10~50             | 10.0                 | S5        |
| WS <sub>2</sub> Nanosheets                         | 5~200             | 1.5                  | S6        |
| g-C <sub>3</sub> N <sub>4</sub>                    | 5~100             | 1.0                  | S7        |
| MoS <sub>2</sub> Nanoparticles                     | 2~100             | 0.32                 | S8        |
| MoS <sub>2</sub> Nanoflakes                        | 0.125~1.75        | 4.1                  | S9        |
| MoS <sub>2</sub> @MgFe <sub>2</sub> O <sub>4</sub> | 2.5~300           | 1.0                  | S10       |
| Fe-g-C <sub>3</sub> N <sub>4</sub>                 | 0.5~10            | 0.05                 | S11       |
| MnSe-g-C <sub>3</sub> N <sub>4</sub>               | 18~1800           | 1.8                  | S12       |

## References

1. Nicell, J.A.; Wright, H. A model of peroxidase activity with inhibition by hydrogen peroxide. *Enzyme Microb. Tech.* **1997**, *21*, 302-310, DOI: 10.1016/S0141-0229(97)00001-X.
2. Lin, Y.; Ren, J.; Qu, X. Catalytically active nanomaterials: a promising candidate for artificial enzymes. *Acc. Chem. Res.* **2014**, *47*, 1097-1105, DOI: 10.1021/ar400250z.
3. Qiao, F.M.; Chen, L.J.; Li, X.; Li L.; Ai, S.Y. Peroxidase-like activity of manganese selenide nanoparticles and its analytical application for visual detection of hydrogen peroxide and glucose. *Sensor. Actuator. B: Chem.* **2014**, *193*, 255-262, DOI: 10.1016/j.snb.2013.11.108.

- S4. Wei, H.; Wang, E.K. Fe<sub>3</sub>O<sub>4</sub> magnetic nanoparticles as peroxidase mimetics and their applications in H<sub>2</sub>O<sub>2</sub> and glucose detection. *Anal. Chem.* **2008**, *80*, 2250–2254, DOI: 10.1021/ac702203f.
- S5. Chen, L.J.; Sun, B.; Wang, X.; Qiao, F.M.; Ai, S.Y. 2D ultrathin nanosheets of Co-Al layered double hydroxides prepared in L-asparagine solution enhanced peroxidase-like activity and colorimetric detection of glucose. *J. Mater. Chem. B* **2013**, *1*, 2268–2274, DOI: 10.1039/C3TB00044C.
- S6. Chen, Q.; Chen, J.; Gao, C.J.; Zhang, M.L.; Chen J.Y.; Qiu, H.D. Hemin-functionalized WS<sub>2</sub> nanosheets as highly active peroxidase mimetics for label-free colorimetric detection of H<sub>2</sub>O<sub>2</sub> and glucose. *Analyst* **2015**, *140*, 2857–2863, DOI: 10.1039/c5an00031A.
- S7. Lin, T.R.; Zhong, L.S.; Wang, J.; Guo, L.Q.; Wu, H.Y.; Guo, Q.Q.; Fu, F.F.; Chen, G.N. Graphite-like carbon nitrides as peroxidase mimetics and their applications to glucose detection. *Biosens. Bioelectron.* **2014**, *59*, 89–93, DOI: 10.1016/j.bios.2014.03.023.
- S8. Zhao, K.; Gu, W.; Zheng, S.S.; Zhang, C.L.; Xian, Y.Z. SDS-MoS<sub>2</sub> nanoparticles as highly-efficient peroxidase mimetics for colorimetric detection of H<sub>2</sub>O<sub>2</sub> and glucose. *Talanta* **2015**, *141*, 47–52, DOI: 10.1016/j.talanta.2015.03.055.
- S9. Yu, J.; Ma, D.Q.; Mei, L.Q.; Gao, Q.; Yin, W.Y.; Zhang, X.; Yan, L.; Gu, Z.J.; Ma, X.Y.; Zhao, Y.L. Peroxidase-like activity of MoS<sub>2</sub> nanoflakes with different modifications and their application for H<sub>2</sub>O<sub>2</sub> and glucose detection. *J. Mater. Chem. B* **2018**, *6*, 487–498, DOI: 10.1039/C7TB02676E.
- S10. Zhang, Y.; Zhou, Z.F.; Wen, F.F.; Tan, J.; Peng, T.; Luo, B.Q.; Wang, H.G.; Yin, S.X. A flower-like MoS<sub>2</sub>-decorated MgFe<sub>2</sub>O<sub>4</sub> nanocomposite: Mimicking peroxidase and colorimetric detection of H<sub>2</sub>O<sub>2</sub> and glucose. *Sensor. Actuator. B: Chem.* **2018**, *275*, 155–162, DOI: 10.1016/j.snb.2018.08.051.
- S11. Tian, J.Q.; Liu, Q.; Asiri, A.M.; Qusti, A.H.; Al-Youbi, A.O.; Sun, X.P. Ultrathin graphitic carbon nitride nanosheets: a novel peroxidase mimetic, Fe doping-mediated catalytic performance enhancement and application to rapid, highly sensitive optical detection of glucose. *Nanoscale* **2013**, *5*, 11604–11609, DOI: 10.1039/C3NR03693F.
- S12. Qiao, F.M.; Qi, Q.Q.; Wang, Z.Z.; Xu, K.; Ai, S.Y. MnSe-loaded g-C<sub>3</sub>N<sub>4</sub> nanocomposite with synergistic peroxidase-like catalysis: Synthesis and application toward colorimetric biosensing of H<sub>2</sub>O<sub>2</sub> and glucose. *Sensor. Actuator. B: Chem.* **2016**, *229*, 379–386, DOI: 10.1016/j.snb.2015.12.109.
